# Supplementary material for: Hand exercise for women with rheumatoid arthritis and decreased hand function: an exploratory randomized controlled trial
Source: Springer Nature journal article supplement (doi:10.1186/s13075-019-1924-9), 2019-06-26
Supplement: MOESM2 [file 16856780]

# **Håndfunktionstræning til leddegigtpatienter**

## Opvarmning

|   |                         |                                                                                                                 |                                                                                     |
|---|-------------------------|-----------------------------------------------------------------------------------------------------------------|-------------------------------------------------------------------------------------|
| A | Knyt hånden led for led | Bøj først de yderste fingerled og slut med knyttet hånd.                                                        | 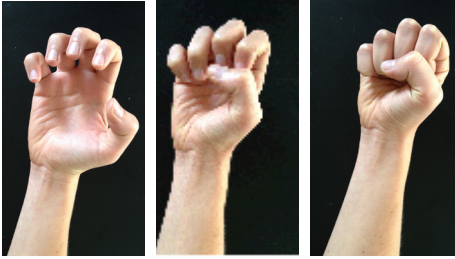  |
| B | "Fingergang"            | Læg håndfladen på bordet. Flyt fingrene enkeltvis i 'gang' i tommelfingerens retning. Start med tommelfingeren. |    |
| C | Fingerspredning         | Hold håndfladen i bordet. Spred fingrene så meget som muligt og saml dem igen.                                  |    |
| D | Tommeløvelse            | Tommelfingeren føres skiftevis til de øvrige finger-spidser. 'Frem og tilbage'.                                 |  |

|   |                       |                                                                                                  |                                                                                     |
|---|-----------------------|--------------------------------------------------------------------------------------------------|-------------------------------------------------------------------------------------|
| E | Håndledsvink          | Hold håndfladen i bordet. Før håndfladen mod tommelfingerens side. Bevægelsen sker i håndleddet. |    |
| F | Håndledsrulning       | Rul håndleddene rundt i begge retninger.                                                         |    |
| G | Skulderrulning        | Rul skuldrene rundt.                                                                             |   |
| H | Hænder til nakke/lænd | Håndfladerne føres skiftevis til nakken og til lænden.                                           |  |

## 2. Styrketræning

Niveau 1 3x8 gentagelser. Borg 3-4 (Se bagside)

Niveau 2 3x8 gentagelser. Borg 4-5 (Se bagside)

Niveau 3 3x8 gentagelser. Borg 5-6 (Se bagside)

Niveau 4 3x10 gentagelser. Borg 5-6 (Se bagside)

### Fingre

|   |               |                                                                                                     |                                                                                    |
|---|---------------|-----------------------------------------------------------------------------------------------------|------------------------------------------------------------------------------------|
| I | Stort greb    | Voksen klemmes i hele hånden.                                                                       |   |
| J | Pincetgreb    | Tommel-, pege- og langefinger klemmer voksen.                                                       |   |
| K | Fingersamling | En mindre klump voks klemmes mellem fingrene. Gentages mellem pege-, lange-, ring-, og lillefinger. |  |

## Håndled

|   |  |                                                                                                                                                                                                                                                      |                                                                                    |
|---|--|------------------------------------------------------------------------------------------------------------------------------------------------------------------------------------------------------------------------------------------------------|------------------------------------------------------------------------------------|
| L |  | <p>Den korte træningselastik sættes om hænderne, så den sidder over knoerne. Underarmene placeres på bordet med tommelfingeren opad. Der trænes én hånd ad gangen. Træk i elastikken ved at vippe håndleddet udad. Bevægelsen sker i håndleddet.</p> |  |
| M |  | <p>Håndfladen placeres under bordet. Der presses op mod undersiden af bordpladen. Hold i 5 sekunde</p>                                                                                                                                               |  |

## Albue

|   |         |                                                                                                                                                                                                                                                                                                      |                                                                                    |
|---|---------|------------------------------------------------------------------------------------------------------------------------------------------------------------------------------------------------------------------------------------------------------------------------------------------------------|------------------------------------------------------------------------------------|
| N | Biceps  | <p>Sid med den lange træningselastik under fødderne. Elastikkens ender vikles rundt om hænderne så elastikken ikke 'hænger'. Overkroppen holdes ret. Albuerne holdes ind mod siden. Armene trænes en ad gangen ved at bøje og strække i albueleddet. Idet der bøjes, føles elastikkens modstand.</p> |  |
| O | Triceps | <p>Elastikken placeres som ved N, her skal du dog bøje dig let fremover. Armene trænes en ad gangen ved at strække i albueleddet og føre armen bagud. Idet der strækkes, føles elastikkens modstand.</p>                                                                                             |   |

### 3. Nedvarmning

|   |                         |                                                                                |                                                                                      |
|---|-------------------------|--------------------------------------------------------------------------------|--------------------------------------------------------------------------------------|
| A | Knyt hånden led for led | Bøj først de yderste fingerled og slut med en knyttet hånd.                    |    |
| D | Tommel opponens         | Tommelfingeren føres skiftevis til de øvrige fingerspidser. 'Frem og tilbage'. |     |
| F | Håndledscirkumduktion   | Rul håndleddene rundt i begge retninger.                                       |    |
| G | Skulderrulling          | Rul skuldrene rundt.                                                           |  |

# Håndfunktionstræning til leddegigtpatienter

| Borg skala |             |
|------------|-------------|
| 0          | Ingenting   |
| 1          | Meget let   |
| 2          | Let         |
| 3          | Moderat     |
| 4          | Lidt hårdt  |
| 5          | Hårdt       |
| 6          |             |
| 7          | Meget hårdt |
| 8          |             |
| 9          |             |

| Træningsniveau                         |          |         |
|----------------------------------------|----------|---------|
| Niveau 1 3x8 gentagelser               | Borg 3-4 | Uge 1-2 |
| Niveau 2 3x8 gentagelser               | Borg 4-5 | Uge 3-4 |
| Niveau 3 3x8 gentagelser               | Borg 5-6 | Uge 5-6 |
| Niveau 4 3x10 gentagelser              | Borg 5-6 | Uge 7-8 |
| Rød elastik: Let<br>Grøn elastik: Tung |          |         |
